# Supplementary material for: Solution chemistry and phase solubility diagrams of CL-20/MTNP energetic cocrystals
Source: Royal Society of Chemistry journal article supplement (doi:10.1039/c9ce01724k), 2020-01-01
Supplement: c9ce01724k1.pdf [file c9ce01724k1.pdf]

## **Supporting information**

### **Solution chemistry and phase solubility diagram of CL-20/MTNP energetic cocrystal**

## **Table of contents**

Section 1: Solubilities of CL-20/MTNP and its components

Section 2: Calculations of eutectic constants

Section 3: Characterizations

## Section 1: Solubilities determinations:

The solubilities of CL-20, MTNP and CL-20/MTNP co-crystal were determined by HPLC measurements in ethanol, ethyl acetate and acetonitrile. The solubilities of CL-20, MTNP and co-crystal were modeled by the Apelblat equation and the curves were shown in figure 1 (a) to (c) respectively. Every examining point was determined by three parallel samples so that these solubilities were given with error bars in figure 1.

The modified Apelblat models derived from Clausius-Claperyron equation can be utilized to describe the trends of solubility as the equation would be given :

$$\ln x = A_1 + \frac{B_1}{T} + c_1 \ln T \quad (T/K) \quad (1)$$

Where the x refers to the mole fraction solubility of CL-20 or MTNP; The solubilities x were given in mol/L. The  $A_1, B_1, C_1$  were all empirical parameters and can be acquired through the calculation of a non-liner least-square method.  $A_1, B_1$  gave a quantification of the variation of the activity coefficient and the solubility of solute in a non-ideal solution respectively while the effect of temperature on fusion enthalpy can be indicated via  $C_1$ .

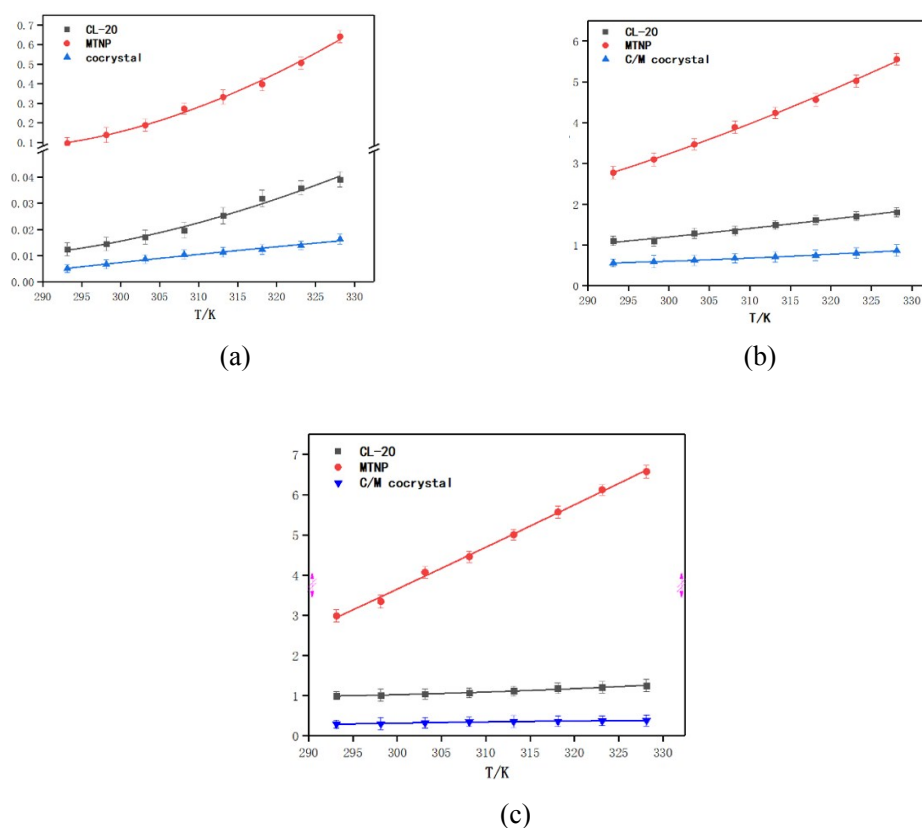

Figure 1 (a) to (c) exhibited the solubilities and solubility curves modeled by Apelblat equation in three solvents for CL-20, MTNP and CL-20/MTNP co-crystal in each fiure.

The concentrations of sample 1,2,3 in figure 1 were actually the same with samples in figure 2. The differences are the x-axis in figure 2 were the reciprocal of MTNP concentrations ( $1/[MTNP]_{total}$ ). The various concentrations of MTNP were controlled and these correspond CL-20 concentrations were determined by HPLC as below. The samples were taken for 1ml to HPLC analysis. And these correspond CL-20 concentrations were determined by HPLC as below. Concentration order 1 to 4 are the test points in 'figure 1(a) to (c)'.

Table 1. Exhibits the various concentrations of CL-20 (mol/L) at different concentrations of MTNP (mol/L) in ethanol (EtoH) at 308.15K.

| Concentration order | MTNP (sample1) | CL-20 (sample1) | MTNP (sample 2) | CL-20 (sample 2) | MTNP (sample 3) | CL-20 (sample 3) |
|---------------------|----------------|-----------------|-----------------|------------------|-----------------|------------------|
| 1                   | 0.00917        | 0.00836         | 0.00904         | 0.00925          | 0.00872         | 0.00885          |
| 2                   | 0.01272        | 0.00667         | 0.0135          | 0.00606          | 0.01243         | 0.00552          |
| 3                   | 0.02408        | 0.00347         | 0.0272          | 0.0037           | 0.0258          | 0.0035           |
| 4                   | 0.0317         | 0.00272         | 0.03301         | 0.00299          | 0.03091         | 0.00262          |

Table 2. Exhibits the various concentrations of CL-20 (mol/L) at different concentrations of MTNP (mol/L) in ethyl acetate (EtoAc) 308.15K

| Concentration order | MTNP (sample1) | CL-20 (sample1) | MTNP (sample 2) | CL-20 (sample 2) | MTNP (sample 3) | CL-20 (sample 3) |
|---------------------|----------------|-----------------|-----------------|------------------|-----------------|------------------|
| 1                   | 0.35192        | 0.35081         | 0.35249         | 0.37012          | 0.35916         | 0.31204          |
| 2                   | 0.66           | 0.16515         | 0.6769          | 0.19986          | 0.64822         | 0.16943          |
| 3                   | 0.99           | 0.1101          | 0.9855          | 0.12915          | 1.01497         | 0.13525          |
| 4                   | 1.32           | 0.08258         | 1.30565         | 0.10772          | 1.33958         | 0.09243          |

Table 3. Exhibits the various concentrations of CL-20 (mol/L) at different concentrations of MTNP (mol/L) in acetonitrile (AN) 308.15K.

| Concentration order | MTNP (sample1) | CL-20 (sample1) | MTNP (sample 2) | CL-20 (sample 2) | MTNP (sample 3) | CL-20 (sample 3) |
|---------------------|----------------|-----------------|-----------------|------------------|-----------------|------------------|
| 1                   | 0.57857        | 0.58771         | 0.60566         | 0.5911           | 0.56566         | 0.54577          |
| 2                   | 1.17           | 0.28889         | 1.12902         | 0.31299          | 1.198           | 0.25689          |
| 3                   | 1.73595        | 0.17259         | 1.78255         | 0.19259          | 1.755           | 0.19259          |
| 4                   | 2.314          | 0.14971         | 2.294           | 0.1551           | 2.35322         | 0.13914          |

## Section 2: Calculated eutectic constants:

In order to calculate the eutectic constants for CL-20/MTNP co-crystal, the general equations of co-crystal dissolution process are necessary to discuss here. Drug A and cocrystal  $A_xB_y$ , equations and definitions of equilibrium constants can be given as equation (2) to (4), Where the  $[A]_{eu}$  and  $[B]_{eu}$  stands for the total concentrations in equilibrium condition at eutectic points with solutions<sup>3</sup> :

$$A_{solid} \leftrightarrow A_{soln} \quad S_{drug} = a_{drug} \quad (2)$$

$$A_x B_{ysolid} \leftrightarrow xA_{soln} + yB_{soln} \quad K_{sp} = a_{drug}^x a_{coformer}^y \quad (3)$$

$$A_{soln} + B_{soln} = AB_{soln} \quad K_{11} = \frac{a_{complex}}{a_{drug} a_{coformer}} \quad (4)$$

Where slon stands for solute in solutions;  $K_{sp}$  and  $K_{11}$  are the solubility product constant and complexation constant in solution respectively.

While the  $[AB]_{soln}$  can be expressed combining with  $K_{11}$ ,  $K_{sp}$  and  $S_{drug}$ :

$$[AB]_{soln} = K_{11} (K_{sp} S_{drug}^{(y-x)})^{\frac{1}{y}} \quad (5)$$

The eutectic constant ( $K_{eu}$ ) is defined by the concentration ratio of conformer to drug:

$$K_{eu} = \frac{[B]_{eu}}{[A]_{eu}} = \frac{[B] + [AB]}{[A] + [AB]}$$

$$= \left[ \frac{\left( \frac{K_{sp}}{S_{drug}^x} \right)^{\frac{1}{y}} + K_{11} (K_{sp} S_{drug}^{y-x})^{\frac{1}{y}}}{S_{drug} + K_{11} (K_{sp} S_{drug}^{y-x})^{\frac{1}{y}}} \right]$$

(6)

The cocrystal to drug solubility ratio is used to determine the eutectic constants and defined as:

$$\alpha = \frac{S_{co-crystal}}{S_d} \quad (7)$$

Base on equations (1) to (3), another calculation of  $K_{eu1}$  via the solubility ratio of co-crystal and CL-20 in pure solvents can be shown as :

$$K_{eu1} = xy^{y/x} \alpha^{(y+x)/x} \quad (8)$$

While for 1:1 co-crystal, the co-crystal to CL-20 solubility ratio ( $\alpha$ ) is shown to determine the excess eutectic co-former concentration and the eutectic constant ( $K_{eu}$ ), which is the ratio of solution concentrations of co-crystal components at the eutectic. Equation (8) also can be simplified as equation (9) below, by which the calculated  $K_{eu1}$  thus we can make comparisons about the calculative and observed  $K_{eu}$  values in Table 3:

$$K_{eu1} = \left( \frac{S_{co - crystal}}{S_d} \right)^2 = \alpha^2 \quad (9)$$

Base on equation (9), the  $K_{eu1}(c)$  can be obtained from the solubilities that were determined previously.

:

### Section 3: Characterization

The simulated PXRD patterns of CL-20/MTNP cocrystal was given here as comparisons with the experimental PXRD patterns in figure 2.

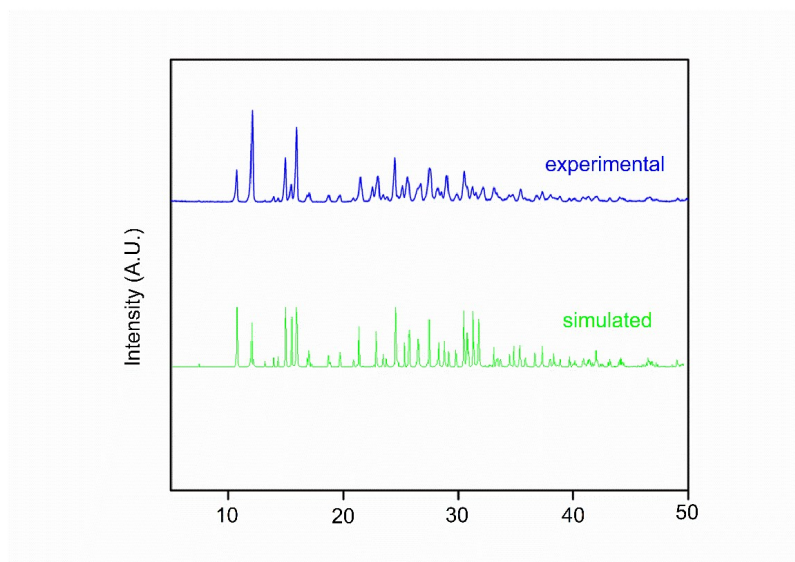

Figure 2. The experimental and simulated PXRD patterns of CL-20/MTNP cocrystal

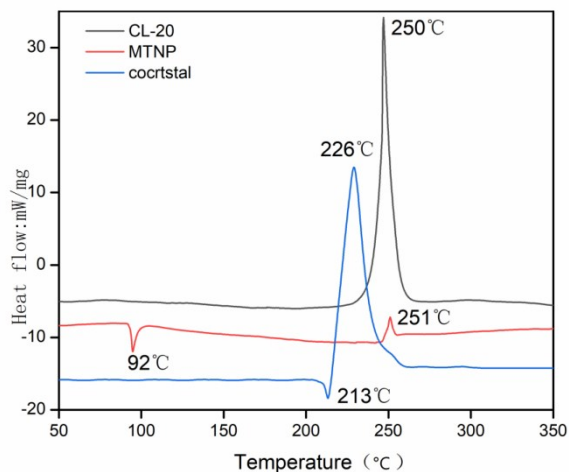

Figure 3. The results of DSC analysis of CL-20/MTNP cocrystal

The thermal analysis of CL-20/MTNP showed the melting point of this cocrystal was improved to be 213°C comparing with 92°C of MTNP. While exothermic decomposition peak was 226°C, lower than 250°C for CL-20 and 251°C for MTNP.

1. A. Alhalaweh, A. Sokolowski, N. Rodriguezhorno and S. P. Velaga, *Crystal Growth & Design*, 2011, 11, 3923-3929.
2. S. J. Nehm, B. Rodriguezspong and N. Rodriguezhorno, *Crystal Growth & Design*, 2006, 6, 592-600.
3. D. J. Good and N. Rodriguezhorno, *Crystal Growth & Design*, 2010, 10, 1028-1032.
